# Supplementary material for: Camphor Sulfonimine Compounds: Bottom-Up Design of MOFs from Organic Frameworks Based on X-rays and DFT-D3
Source: MDPI journal article supplement (doi:10.3390/cryst13101499), 2023-10-14
Supplement: s1 [file s1]

## Camphor Sulfonylimine Compounds: Bottom-Up

### Design of MOF's from Organic Frameworks Based on X-rayS and DFT-D3

Joana P. Costa <sup>a</sup>, M. Fernanda N.N. Carvalho <sup>a</sup> and Adelino M. Galvão <sup>b,\*</sup>

<sup>a</sup> Centro de Química Estrutural, Institute of Molecular Sciences and Departamento de Engenharia Química, Instituto Superior Técnico, Universidade de Lisboa, Avenida António José de Almeida, n.º 12, 1000-043 Lisboa, Portugal.

<sup>b</sup> Centro de Química Estrutural, Institute of Molecular Sciences and Departamento de Engenharia Química, Instituto Superior Técnico, Campus Taguspark, Universidade de Lisboa, Av. Prof. Doutor Cavaco Silva 2744-016 Porto Salvo, Portugal,

\* Correspondence: E-mail: [adelino@tecnico.ulisboa.pt](mailto:adelino@tecnico.ulisboa.pt).

#### Supplementary data

Spectroscopic information: <sup>1</sup>H, <sup>13</sup>C NMR and FTIR experimental data is provided for coordination compounds C1 and C2.

#### Coordination compound C1

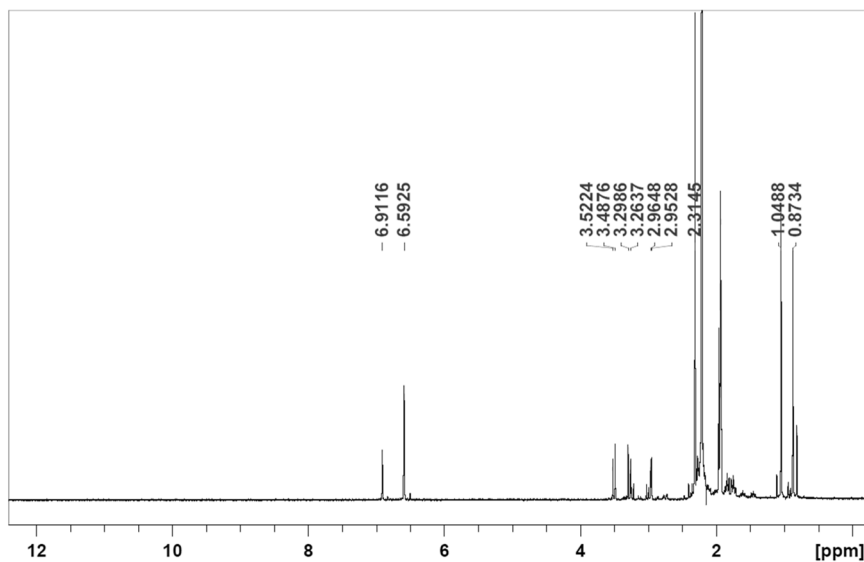

Fig. S1 – NMR <sup>1</sup>H spectrum of compound C1.

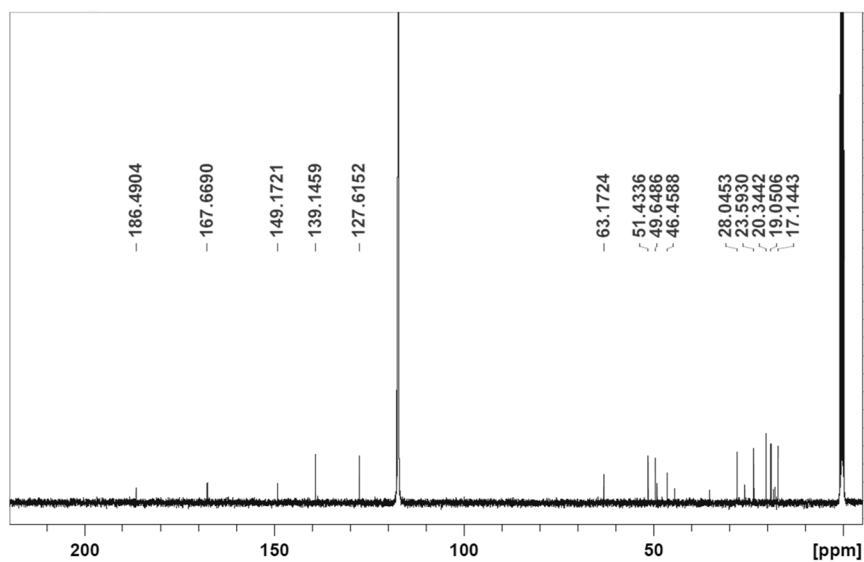

Fig. S2 – NMR <sup>13</sup>C spectrum of compound C1.

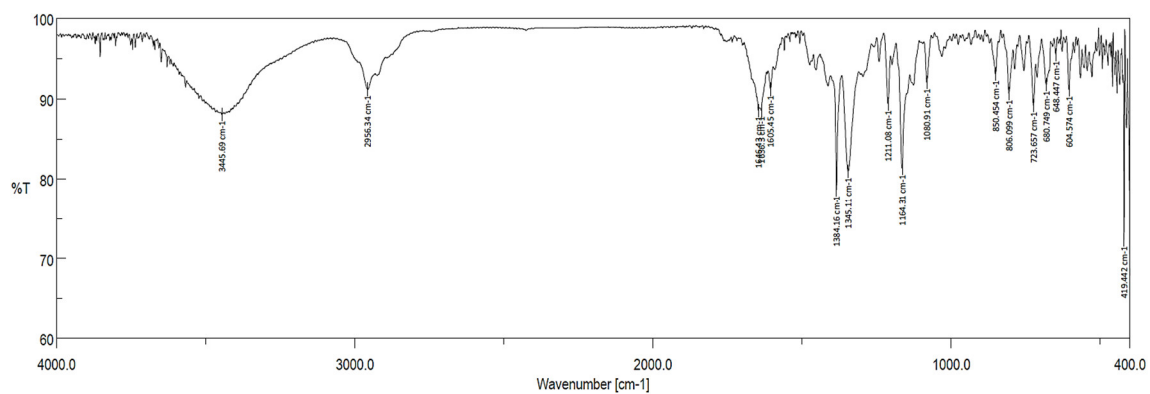

Fig. S3 – FTIR spectrum of compound C1.

Coordination compound **C2**

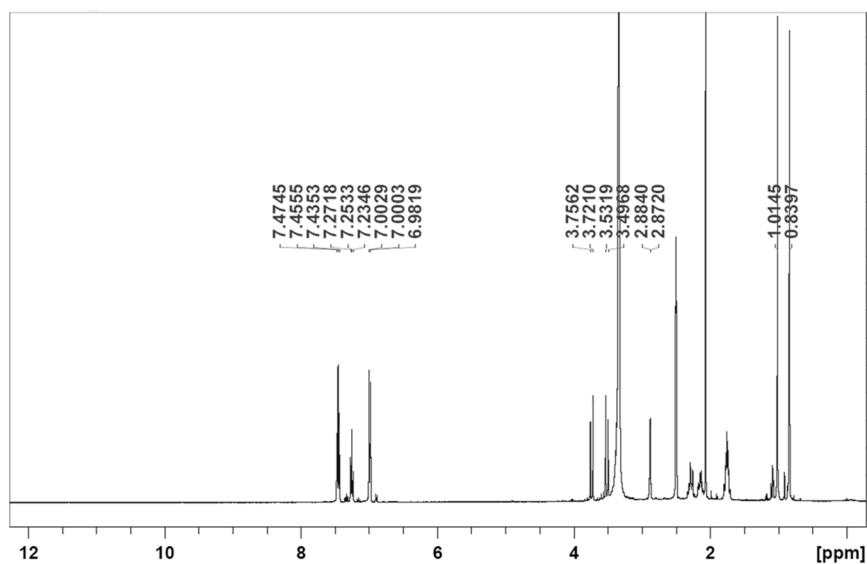

Fig. S4 – NMR <sup>1</sup>H spectrum of compound C2.

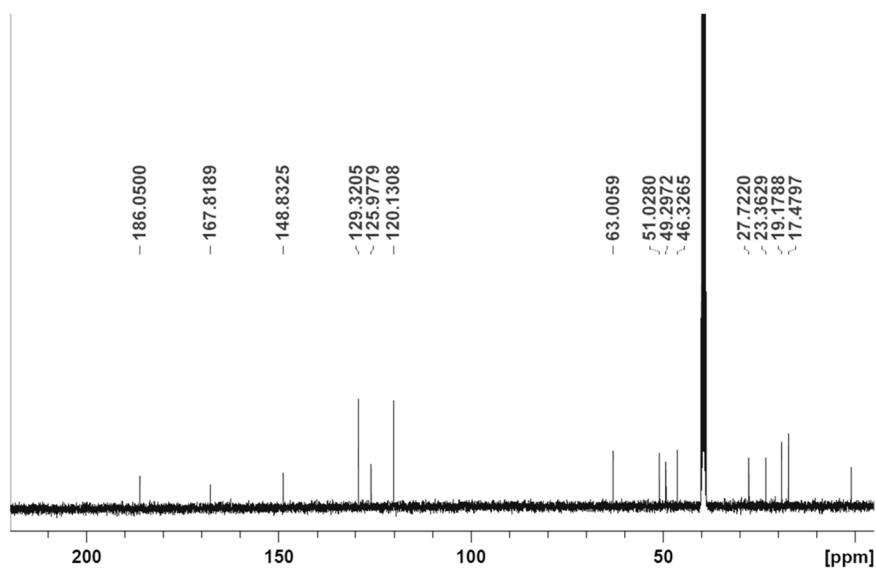

Fig. S5 – NMR <sup>13</sup>C spectrum of compound C2.

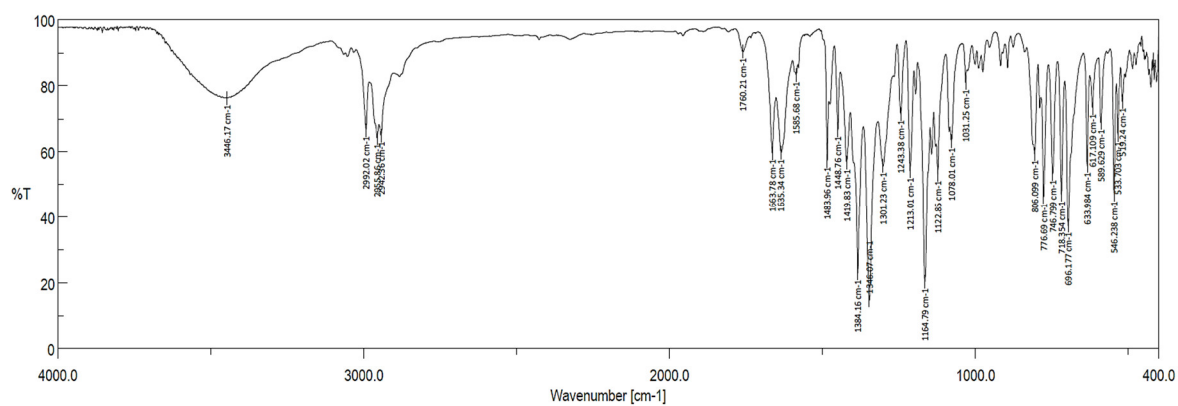

Fig. S6 – FTIR spectrum of compound C2.
